# Supplementary material
Source: Springer Nature journal article supplement (https://www.springermedizin.de/resource/supplementary/12943_2012_1199_MOESM3_ESM.pdf/9552378)
Supplement: MOESM3 [file 9552378]

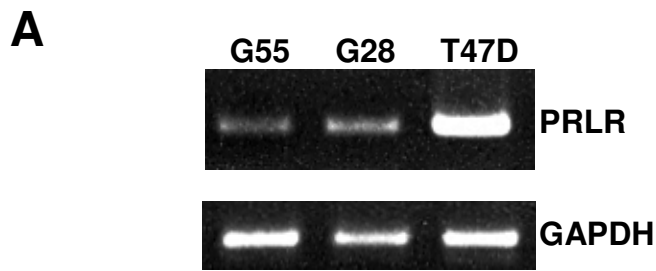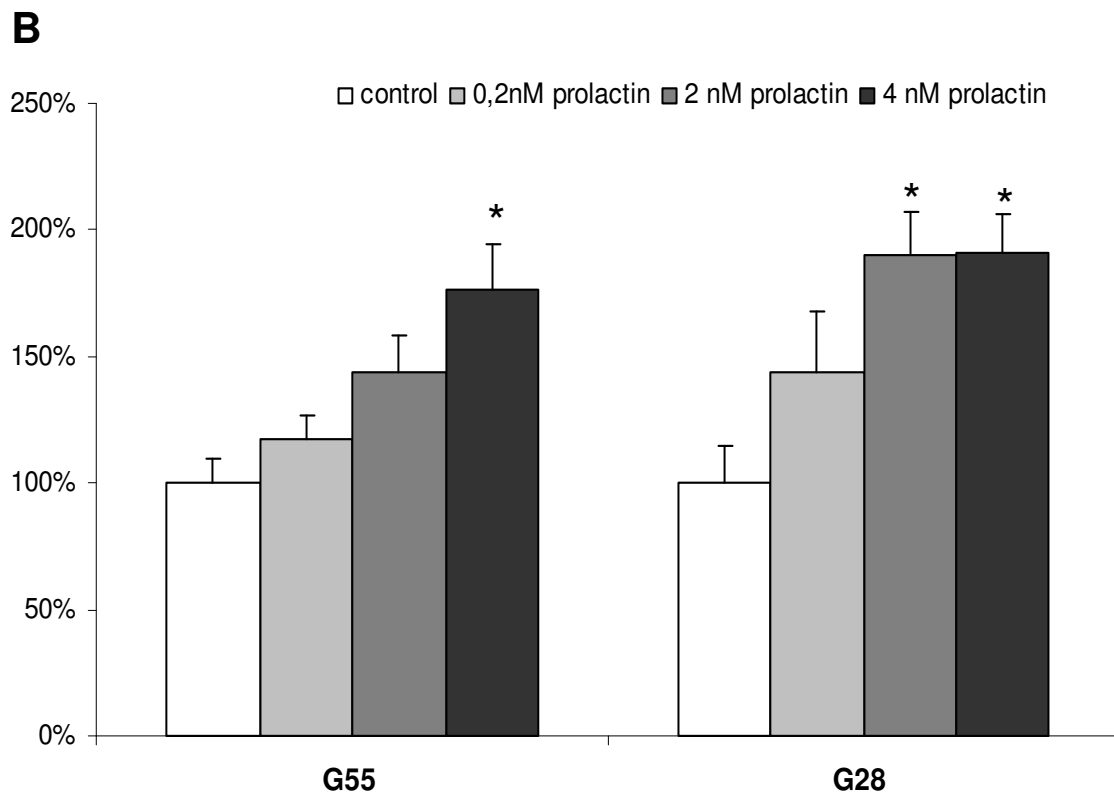

**Supplementary Figure 2S. Effect of PRL on glioma cell proliferation.** Endogenous PRLR expression at mRNA level was detected in both G28 and G55 cells using RT-PCR (A). Human breast cancer cell line T47D was used as a positive control. Prolactin (PRL) stimulated cell proliferation of both cell lines in a dose-dependent manner (B). Bars represent the mean values  $\pm$  SE (n=5-6); \* on bars indicates significant differences vs. control ( $p < 0.05$ ).
